# Supplementary material
Source: publisher site journal article supplement (https://studysites.sagepub.com/gribben/Web%20Material%20(Appendix)/Gribben_Web%20Material%20(Appendix)_Ch-01.pdf)
Supplement: Supplementary file 1 [file Gribben_Web%20Material%20(Appendix)_Ch-01.pdf]

## Appendix 1: Activity 1.3 Answers

---

|                                                                          |   |
|--------------------------------------------------------------------------|---|
| Use mind maps or shapes to connect and understand information            | V |
| Read information aloud so you can hear it                                | A |
| Record information so you can listen back                                | A |
| Use colours to highlight information and then read it                    | V |
| Tap your fingers on your arm when counting                               | T |
| Discuss concepts with others                                             | A |
| Use colours to highlight information and then create a picture or object | T |
| Follow a mind map easier than written instructions                       | V |
| Use music or mnemonics to learn information                              | A |
| Move around or walk when you're reading                                  | T |
| See patterns in information                                              | V |
| Enjoy practical tasks that help you learn                                | T |

---
